# Supplementary material for: Hospitalized COVID-19 Patients with Severe Acute Respiratory Syndrome: A Population-Based Registry Analysis to Assess Clinical Findings, Pharmacological Treatment and Survival
Source: MDPI journal article supplement (doi:10.3390/medicina58060829), 2022-06-19
Supplement: s1 [file s1]

**Supplementary Table S1.** List of medicines used in the COVID-19 treatment according to Spanish guidelines [11,12].

| Medicines Type | ATC Code | Medicine           | Medicines Type  | ATC Code | Medicine                |
|----------------|----------|--------------------|-----------------|----------|-------------------------|
| Antibiotics    | J01DD01  | Cefotaxime         | Anti SIRS Drugs | L01XE18  | Ruxolitinib             |
|                | J01DD04  | Ceftriaxone        |                 | L03AB05  | Interferon alpha 2b     |
|                | J01DD16  | Cefditoren         |                 | L03AB08  | Interferon beta 1b      |
|                | J01DI02  | Ceftaroline        |                 | L04AA37  | Baricitinib             |
|                | J01FA09  | Clarithromycin     |                 | L04AC03  | Anakinra                |
|                | J01FA10  | Azithromycin       |                 | L04AC07  | Tocilizumab             |
|                | J01MA12  | Levofloxacin       |                 | L04AC11  | Siltuximab              |
|                | J01MA14  | Moxifloxacin       |                 | L04AC14  | Sarilumab               |
| Antimalarials  | J01XA02  | Teicoplanine       | Antivirals      | J05AR10  | Lopinavir and Ritonavir |
|                | P01BA01  | Chloroquine        |                 | J05AX95* | Remdesivir              |
|                | P01BA02  | Hidroxychloroquine | Steroids        | H02AB04  | Methylprednisolone      |
|                |          |                    |                 | H02AB07  | Prednisone              |

\*Provisional ATC Code

Abbreviations: SIRS, systemic inflammatory response syndrome

**Supplementary Table S2.** Treatment and clinical outcomes evolution of in-hospital COVID-19 patients with acute respiratory distress syndrome in Castile and Leon (Spain) (March 1st - May 31st, 2020).

|                                    | N   | 1-14 March<br>26           | 15-31 March<br>529         | 1-14 April<br>265          | 15-30 April<br>123         | 1-14 May<br>56             | 15-31 May<br>26             |
|------------------------------------|-----|----------------------------|----------------------------|----------------------------|----------------------------|----------------------------|-----------------------------|
| <b>Antibiotics</b>                 |     | <b>80.77 (65.62-95.92)</b> | <b>89.41 (86.79-92.04)</b> | <b>89.81 (86.17-93.45)</b> | <b>89.43 (84-94.86)</b>    | <b>89.29 (81.18-97.39)</b> | <b>88.46 (76.18-100.74)</b> |
| Ceftriaxone                        |     | 46.15 (26.99-65.32)        | 67.67 (63.69-71.66)        | 68.3 (62.7-73.9)           | 65.04 (56.61-73.47)        | 78.57 (67.82-89.32)        | 65.38 (47.1-83.67)          |
| Azithromycin                       |     | 26.92 (9.87-43.97)         | 65.6 (61.55-69.64)         | 70.57 (65.08-76.05)        | 66.67 (58.34-75)           | 60.71 (47.92-73.51)        | 50 (30.78-69.22)            |
| Lovofloxacin                       |     | 50 (30.78-69.22)           | 23.06 (19.47-26.65)        | 18.87 (14.16-23.58)        | 21.95 (14.64-29.27)        | 17.86 (7.83-27.89)         | 26.92 (9.87-43.97)          |
| Cefditoren                         |     | -                          | 5.48 (3.54-7.42)           | 3.77 (1.48-6.07)           | 4.88 (1.07-8.68)           | 3.57 (0.29-5.43)           | 3.85 (0.55-8.24)            |
| Clarithromycin                     |     | 3.85 (0.55-8.24)           | 0.57 (0.07-1.03)           | 0.38 (0.06-0.94)           | 1.63 (0.61-2.86)           | 1.79 (0.68-3.25)           | -                           |
| Teicoplanin                        |     | 3.85 (0.55-8.24)           | 1.13 (0.23-2.04)           | 2.26 (0.47-4.06)           | -                          | -                          | -                           |
| Cefotaxime                         |     | -                          | 0.19 (0.08-0.36)           | 0.38 (0.06-0.94)           | -                          | -                          | -                           |
| Moxifloxacin                       |     | -                          | -                          | 0.75 (0.29-1.62)           | -                          | -                          | -                           |
| Ceftaroline                        |     | -                          | -                          | -                          | -                          | -                          | -                           |
| <b>Antimalarials</b>               |     | <b>57.69 (38.7-76.68)</b>  | <b>76.94 (73.35-80.53)</b> | <b>70.19 (64.68-75.7)</b>  | <b>56.91 (48.16-65.66)</b> | <b>28.57 (16.74-40.4)</b>  | <b>15.38 (1.52-29.25)</b>   |
| Hydroxychloroquine                 |     | 46.15 (26.99-65.32)        | 70.7 (66.82-74.58)         | 68.3 (62.7-73.9)           | 56.1 (47.33-64.87)         | 26.79 (15.19-38.38)        | 11.54 (0.74-22.82)          |
| Chloroquine                        |     | 11.54 (0.74-22.82)         | 8.13 (5.8-10.46)           | 1.89 (0.25-3.52)           | 0.81 (0.07-2.24)           | 1.79 (0.68-3.25)           | 3.85 (0.55-8.24)            |
| <b>Steroids</b>                    |     | <b>50 (30.78-69.22)</b>    | <b>49.15 (44.89-53.41)</b> | <b>63.77 (57.99-69.56)</b> | <b>65.85 (57.47-74.23)</b> | <b>64.29 (51.74-76.84)</b> | <b>53.85 (34.68-73.01)</b>  |
| Methylprednisolone                 |     | 46.15 (26.99-65.32)        | 47.64 (43.38-51.89)        | 61.51 (55.65-67.37)        | 63.41 (54.9-71.93)         | 64.29 (51.74-76.84)        | 50 (30.78-69.22)            |
| Prednisone                         |     | 11.54 (0.74-22.82)         | 10.02 (7.46-12.58)         | 12.45 (8.48-16.43)         | 13.01 (7.06-18.95)         | 5.36 (0.54-10.25)          | 11.54 (0.74-22.82)          |
| <b>Antivirals</b>                  |     | <b>53.85 (34.68-73.01)</b> | <b>58.03 (53.83-62.24)</b> | <b>38.49 (32.63-44.35)</b> | <b>15.45 (9.06-21.83)</b>  | <b>5.36 (0.54-10.25)</b>   | <b>3.85 (0.55-8.24)</b>     |
| Lopinavir-Ritonavir                |     | 53.85 (34.68-73.01)        | 58.03 (53.83-62.24)        | 38.11 (32.27-43.96)        | 15.45 (9.06-21.83)         | 5.36 (0.54-10.25)          | 3.85 (0.55-8.24)            |
| Remdesevir                         |     | 0 (0-0)                    | 0.38 (0.14-0.76)           | 0.38 (0.06-0.94)           | -                          | -                          | -                           |
| <b>Tocilizumab</b>                 |     | <b>19.23 (4.08-34.38)</b>  | <b>20.6 (17.16-24.05)</b>  | <b>20.75 (15.87-25.64)</b> | <b>11.38 (5.77-16.99)</b>  | -                          | <b>3.85 (0.55-8.24)</b>     |
| <b>Other Anti-SIRS</b>             |     | <b>19.23 (4.08-34.38)</b>  | <b>15.12 (12.07-18.18)</b> | <b>10.94 (7.18-14.7)</b>   | <b>5.69 (1.6-9.79)</b>     | -                          | <b>3.85 (0.55-8.24)</b>     |
| Interferon Beta                    |     | 19.23 (4.08-34.38)         | 13.61 (10.69-16.53)        | 5.28 (2.59-7.98)           | -                          | -                          | 3.85 (0.55-8.24)            |
| Anakinra                           |     | -                          | 1.51 (0.47-2.55)           | 4.53 (2.02-7.03)           | 4.07 (0.58-7.55)           | -                          | 3.85 (0.55-8.24)            |
| Baricitinib                        |     | -                          | 0.19 (0.08-0.36)           | 1.13 (0.14-2.16)           | 1.63 (0.61-2.86)           | -                          | -                           |
| Ruxolitinib                        |     | -                          | 0.19 (0.08-0.36)           | 0.19 (0.08-0.36)           | -                          | -                          | -                           |
| Hospital LoS (median + IQR)        |     | 18.5 (8-42)                | 11 (6-21)                  | 12 (5-19)                  | 10 (6-16)                  | 8 (5-13.5)                 | 5.5 (4-10)                  |
| ICU LoS (median + IQR)             |     | 23                         | 15.50( 9-26)               | 13 (8-22)                  | 18 (8-22)                  | 5.5 (1-10)                 | -                           |
|                                    | N=1 |                            | N=71                       | N=19                       | N=4                        | N=4                        | N=0                         |
| Death (% 95 CI)                    |     | 76.92 (60.73-93.12)        | 48.58 (44.32-52.84)        | 38.49 (32.63-44.35)        | 30.08 (21.98-38.19)        | 26.79 (15.19-38.38)        | 19.23 (4.08-34.38)          |
| AKI (% 95 CI)                      |     | 3.85 (0.55-8.24)           | 18.34 (15.04-21.63)        | 20.38 (15.53-25.23)        | 19.51 (12.51-26.52)        | 19.64 (9.24-30.05)         | 19.23 (4.08-34.38)          |
| Fungal superinfection (% 95 CI)    |     | 15.38 (1.52-29.25)         | 5.48 (3.54-7.42)           | 3.77 (1.48-6.07)           | 8.94 (3.9-13.99)           | 1.79 (0.68-3.25)           | -                           |
| Bacterial superinfection (% 95 CI) |     | 3.85 (0.55-8.24)           | 3.21 (1.71-4.72)           | 6.04 (3.17-8.91)           | 2.44 (0.29-4.17)           | 10.71 (2.61-18.82)         | 7.69 (2.55-13.93)           |
| SIRS (% 95 CI)                     |     | 3.85 (0.55-8.24)           | 2.84 (1.42-4.25)           | 5.66 (2.88-8.44)           | 3.25 (0.12-6.39)           | 5.36 (0.54-10.25)          | 7.69 (2.55-13.93)           |
| Carodiomyopathy (% 95 CI)          |     | -                          | 1.51 (0.47-2.55)           | 1.13 (0.14-2.16)           | 4.88 (1.07-8.68)           | 1.79 (0.68-3.25)           | 3.85 (0.55-8.24)            |
| DIC (% 95 CI)                      |     | -                          | 0.57 (0.07-1.03)           | 0.75 (0.29-1.62)           | -                          | 1.79 (0.68-3.25)           | 3.85 (0.55-8.24)            |

Abbreviations: 95 CI, confidence interval, LoS, length of stay, ICU, intensive care unit, AKI, acute kidney injury, SIRS, systemic inflammatory response syndrome, DIC, disseminated intravascular coagulation.
